# Supplementary material
Source: publisher figshare collection journal article supplement (https://springernature.figshare.com/ndownloader/files/15364079)
Supplement: Supplementary file [file 15364079]

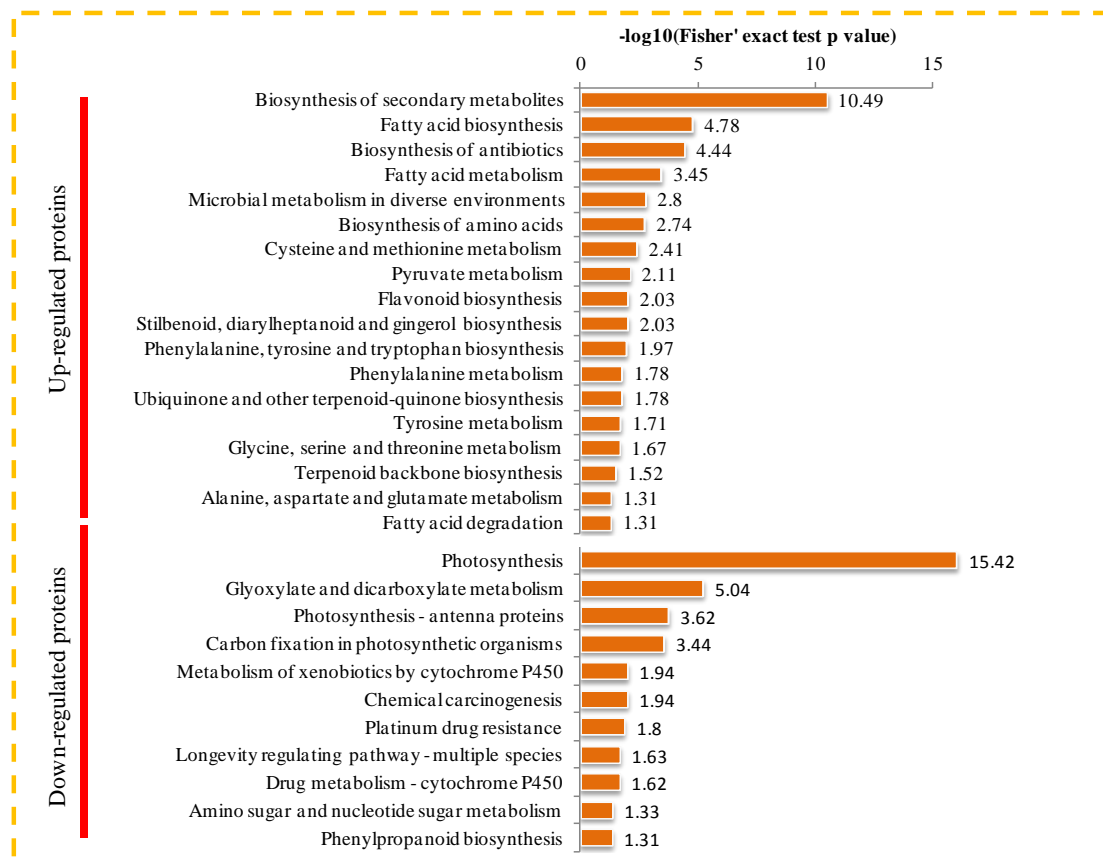

Figure S2 KEGG enrichment analysis of the DAPs during the ripening process of papaya fruit.
